# Supplementary material for: Design of ferromagnetic alternating stacks of neutral and ion-radical hydrocarbons
Source: Royal Society of Chemistry journal article supplement (doi:10.1039/b309328j), 2003-01-01
Supplement: b309328j.pdf [file b309328j.pdf]

**Electronic Supplementary Information**

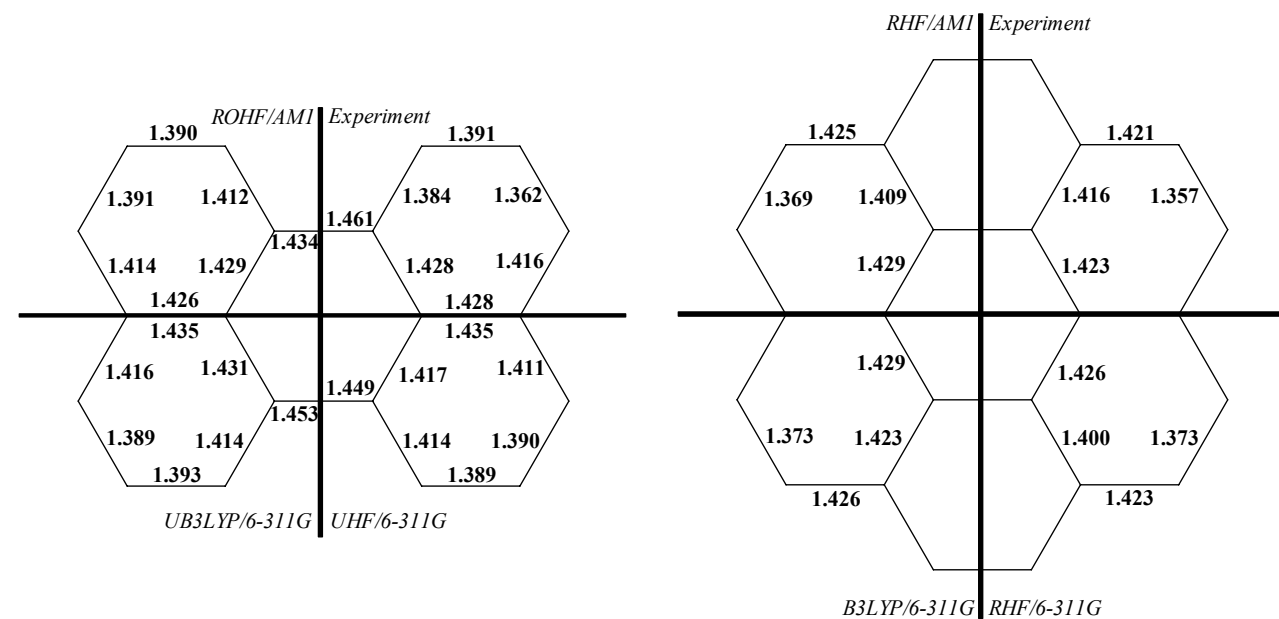

A

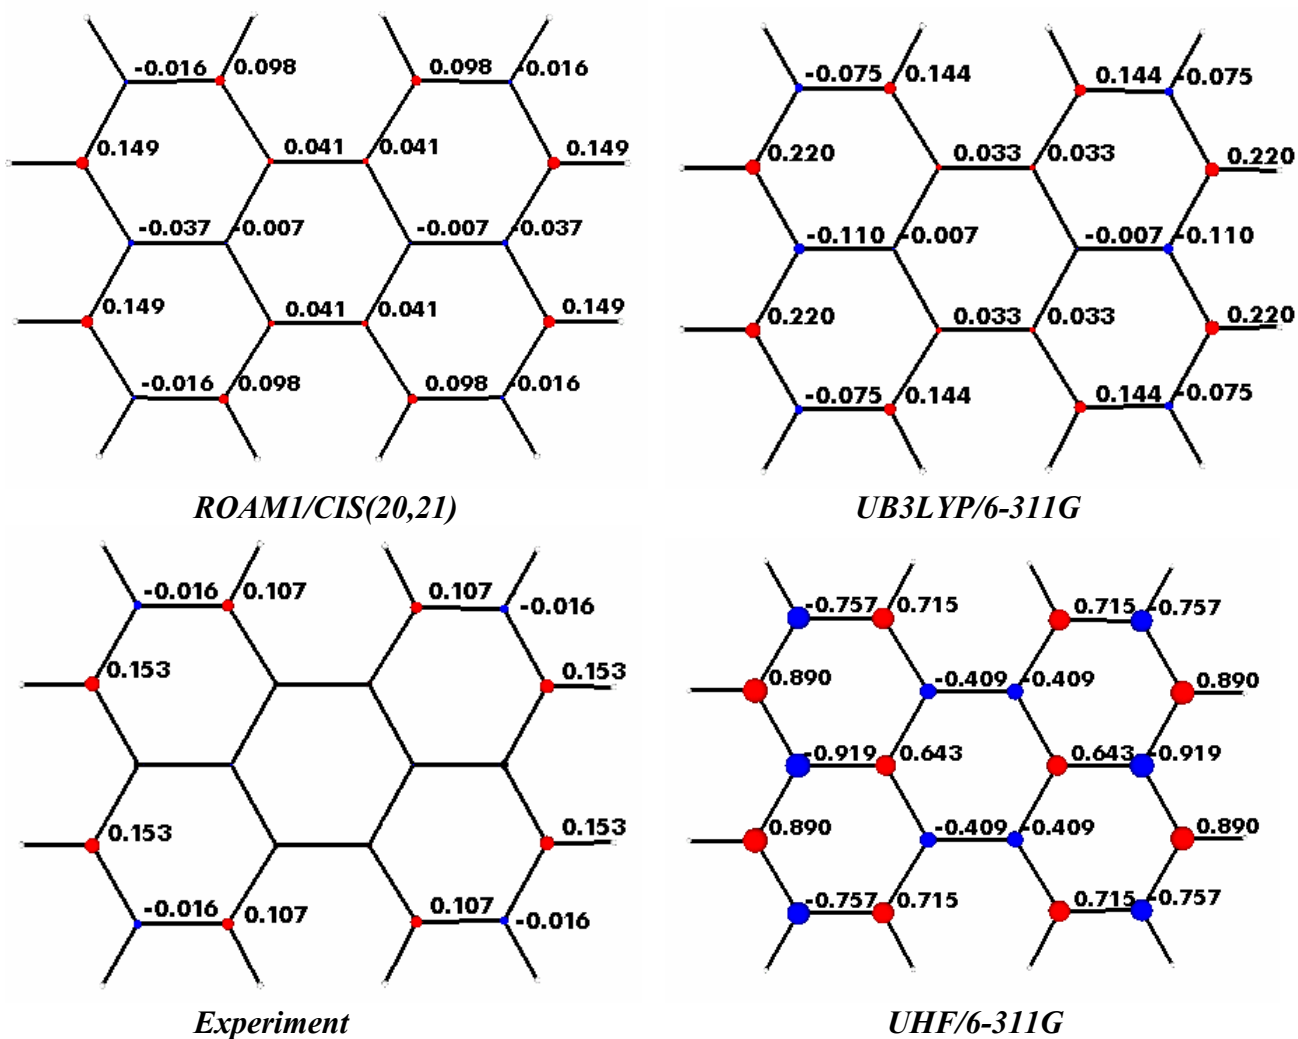

B

Fig. S1: Optimised geometry (A) of neutral coronene and perylene cation-radical and calculated spin densities (B) of the radical. Comparison of different levels of theory

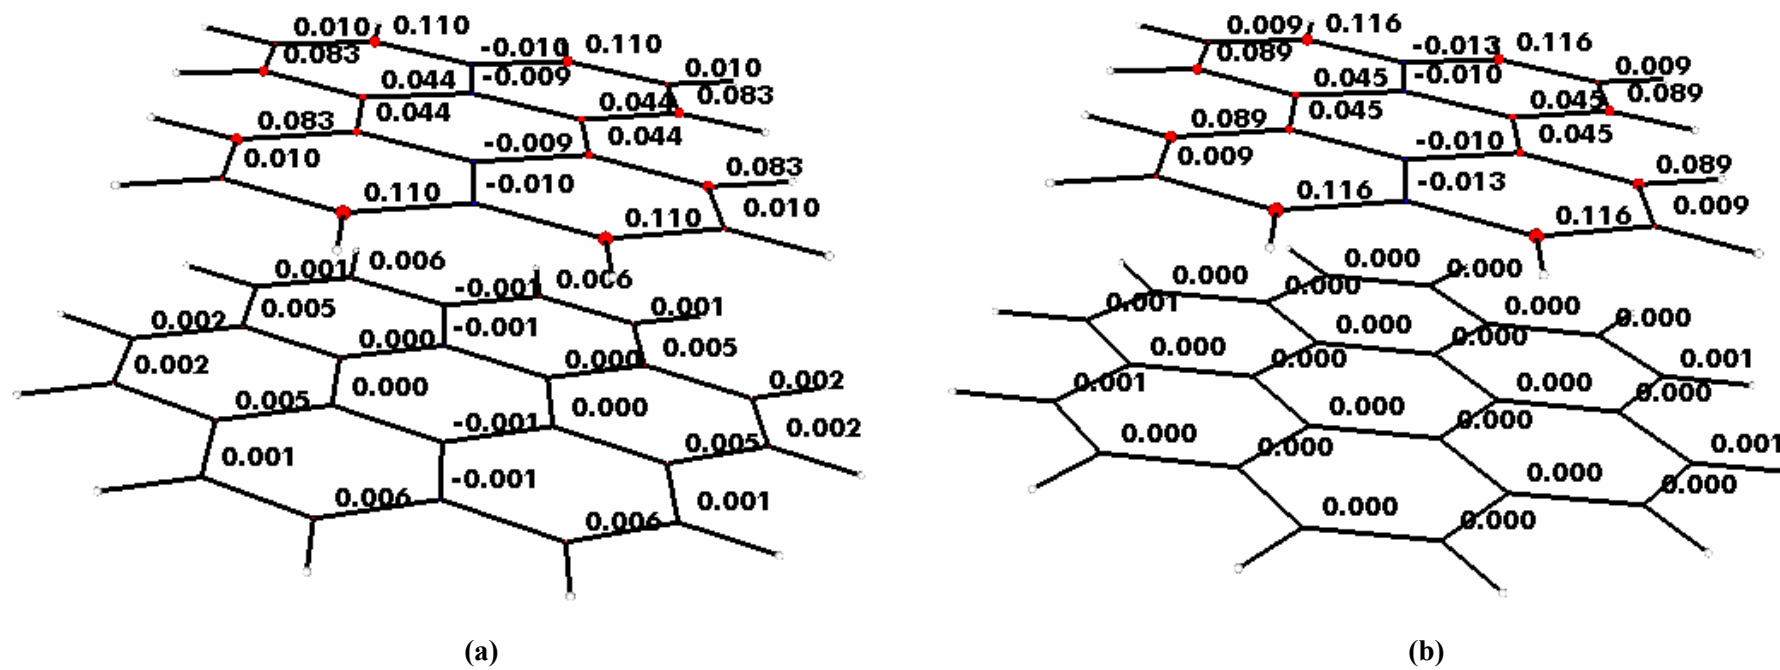

Fig. S2: ROAM1/CIS(19,19) calculated spin densities of coronene/perylene<sup>+</sup> dimers - (a) strict on-top stacking; (b) 90° rotated coronene

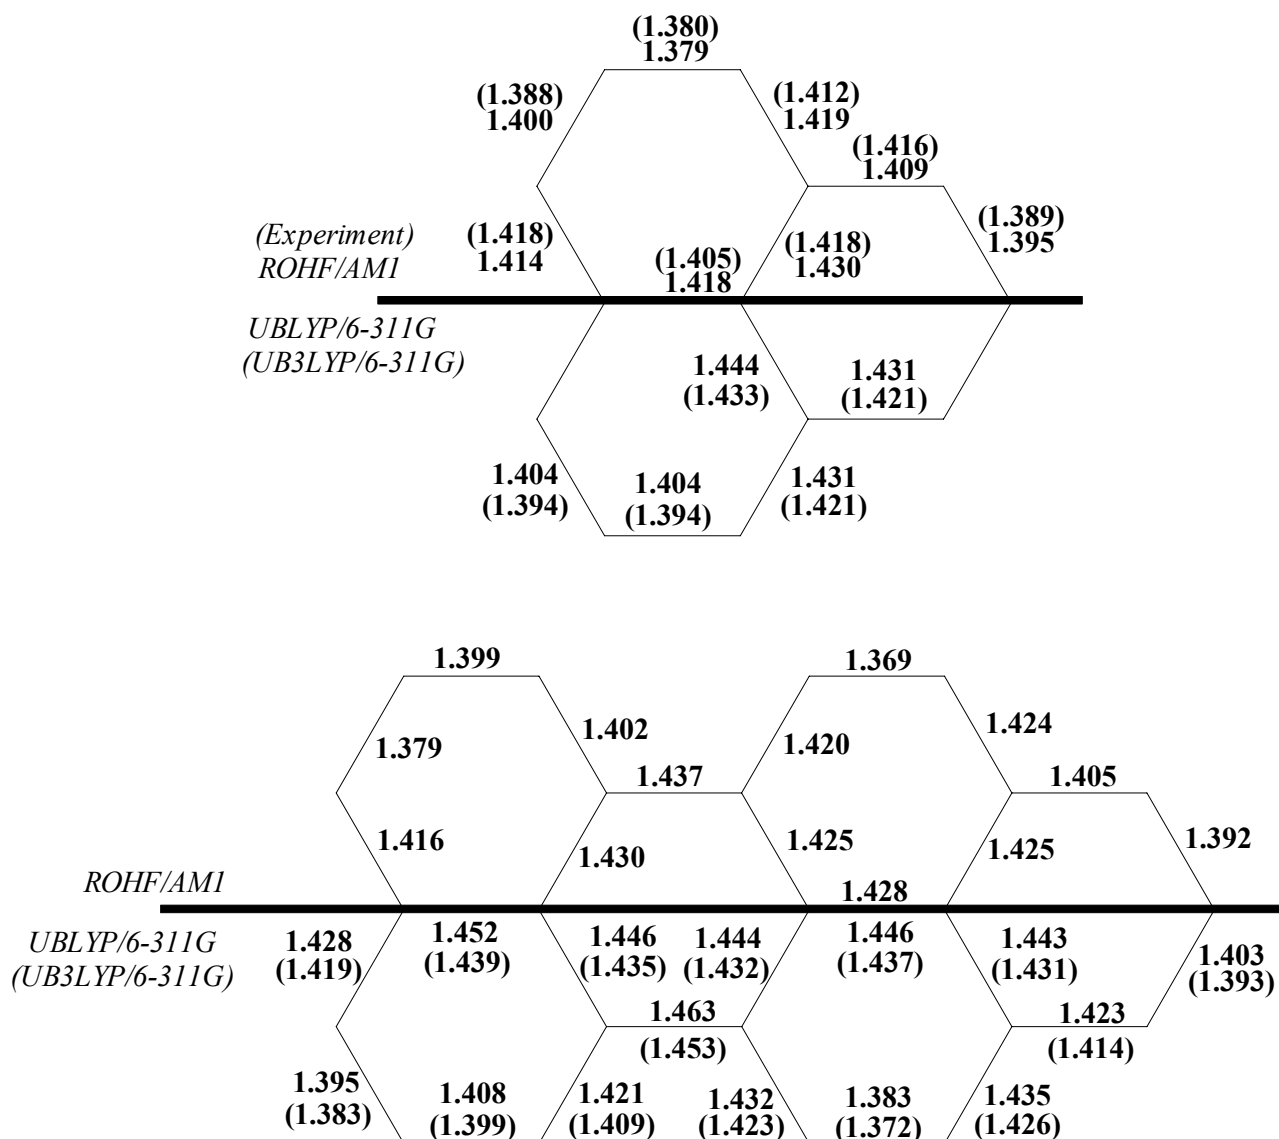

Fig. S3: Optimised bond lengths of **2** and **3**. The experimental values (averaged from the X-ray structure) for the tri-*tert*-butyl derivative of **2** are shown for comparison [27]. The symmetry breaking in the experimental bond lengths is probably due to the antisymmetric dimeric crystallisation pattern [27].

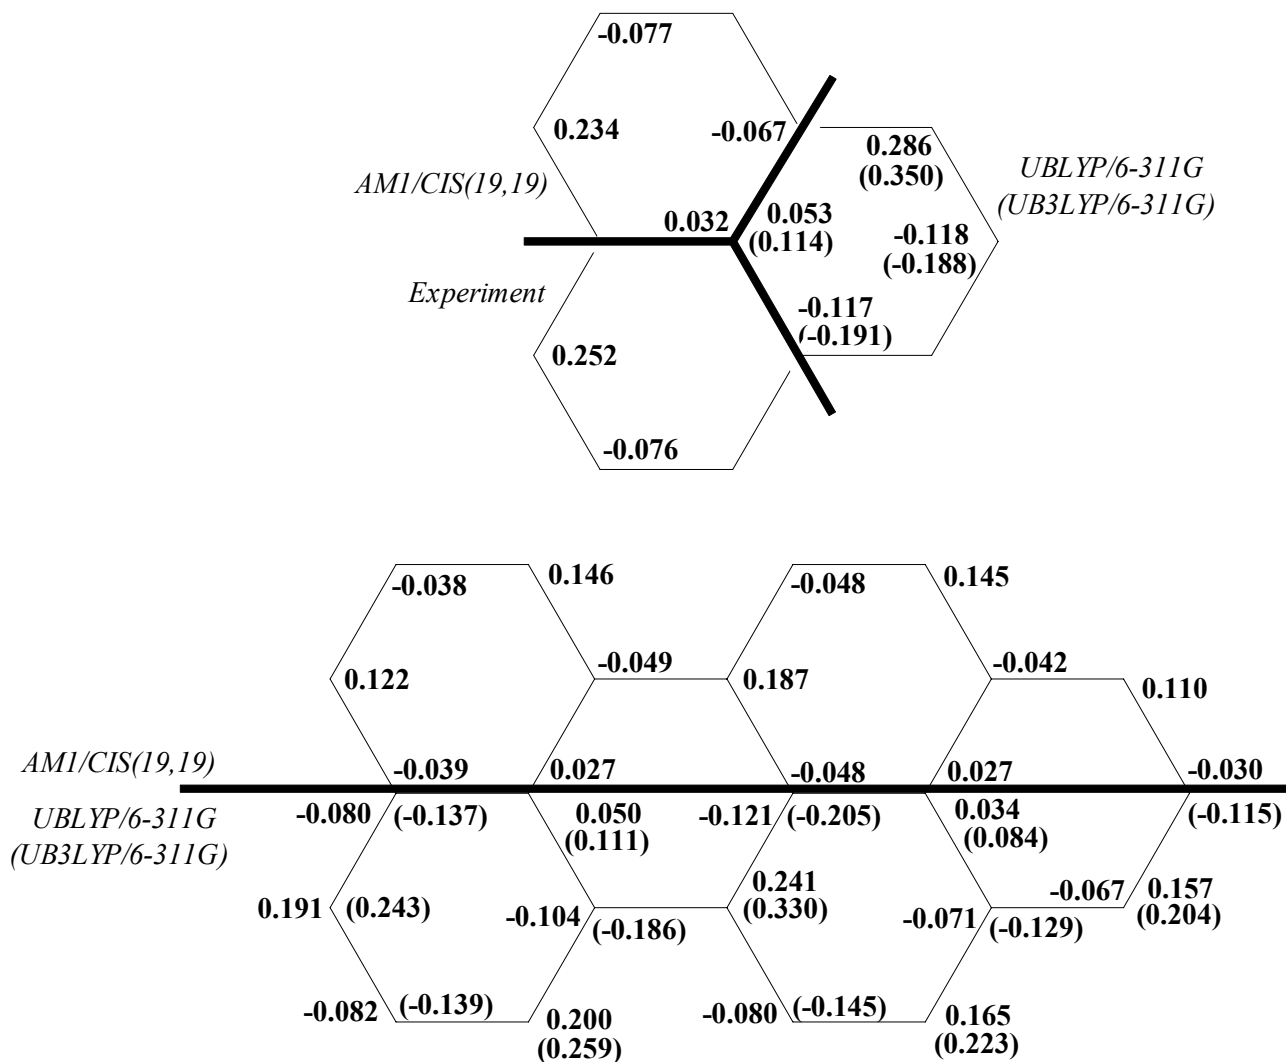

Fig. S4: Calculated AM1/CIS (19,19), UBLYP and UB3LYP spin densities of **2** and **3**. The experimental values for **2** calculated from the hyperfine coupling constants [26] according to the McConnell equation:  $a_H = -Q \cdot \rho$ , with  $Q = 70 \text{ MHz}^{-1}$  are shown for comparison

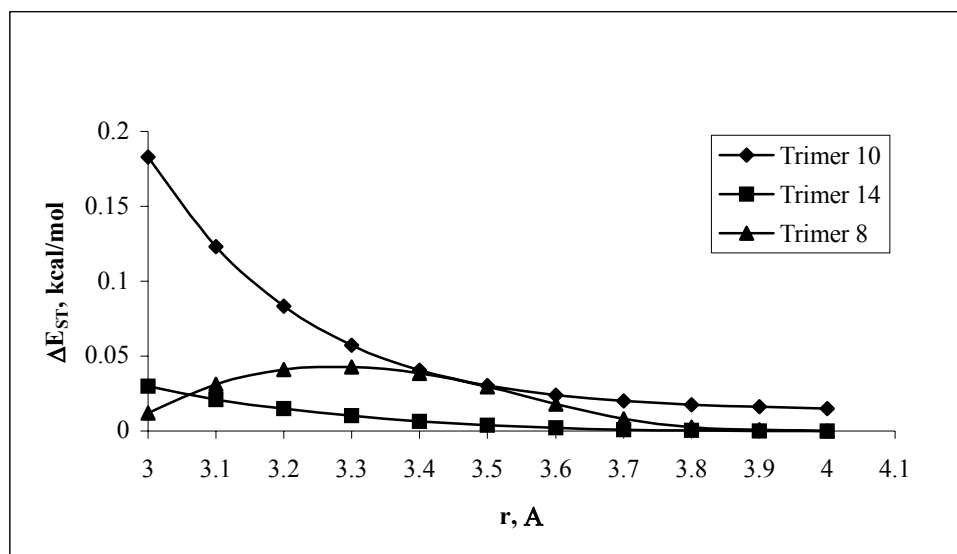

Fig. S5:  $\Delta E_{ST}$  of **8** ( $90^\circ$ -rotated), **10** and **14** as a function of the interplanar distance. The values were calculated with ROAM1 / CAS (8,10)
